# Supplementary material for: Oxidation of Peroxiredoxin 6 in the Presence of GSH Increases its Phospholipase A2 Activity at Cytoplasmic pH
Source: MDPI journal article supplement (doi:10.3390/antiox8010004), 2018-12-24
Supplement: s1 [file s1]

## Supplemental data

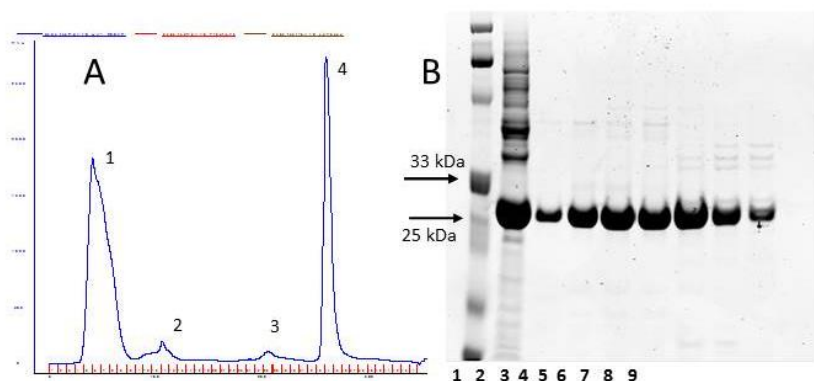

**Figure S1.** Purification of codon optimized recombinant human Prdx6 with an ion-exchange (DEAE cellulose) column. **A.** Analysis of effluent from the column. Peak 1, flow through (Prdx6); peaks 2 & 3, not analyzed; peak 4, proteins eluted with high salt. **B.** PAGE (stained with Coomassie blue) of the flow-through from the column. Lane 1: molecular weight markers; the arrow indicates 33 kDa; Lane 2: Starting material (input); Lanes 3–9: Fractions 8–14 from peak 1. The bands at ~25 kDa represent 97–99% of the Coomassie-stained protein in the lane.

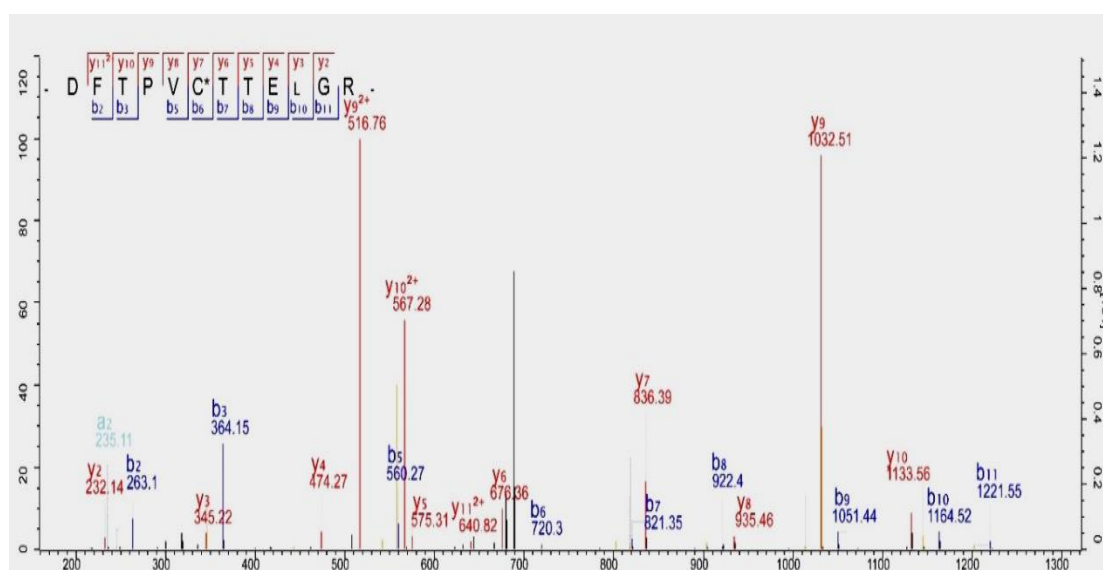

(A)

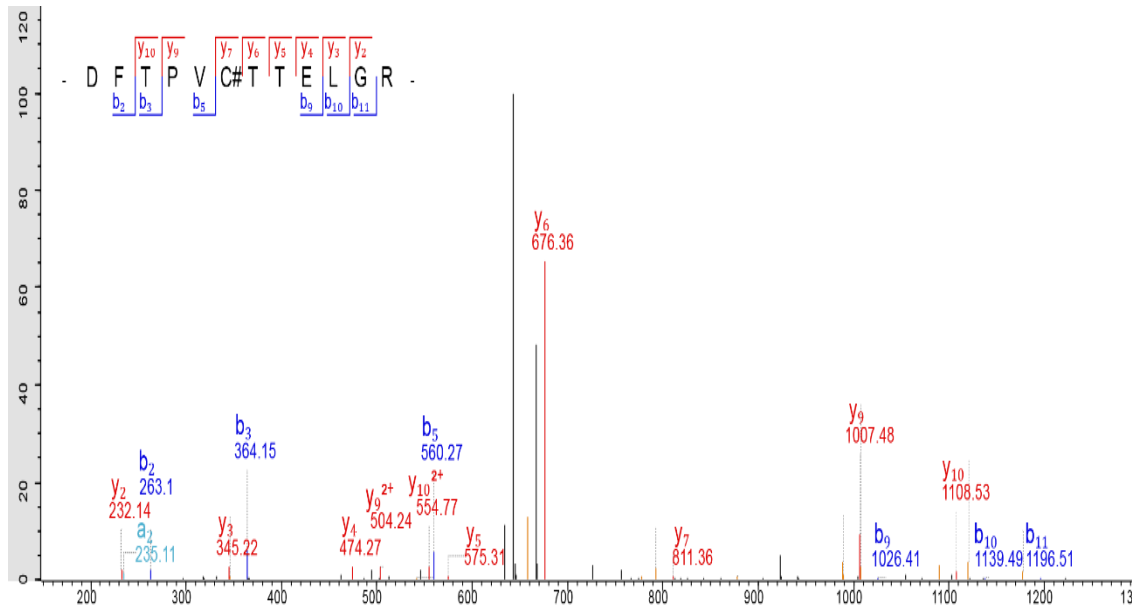

(B)

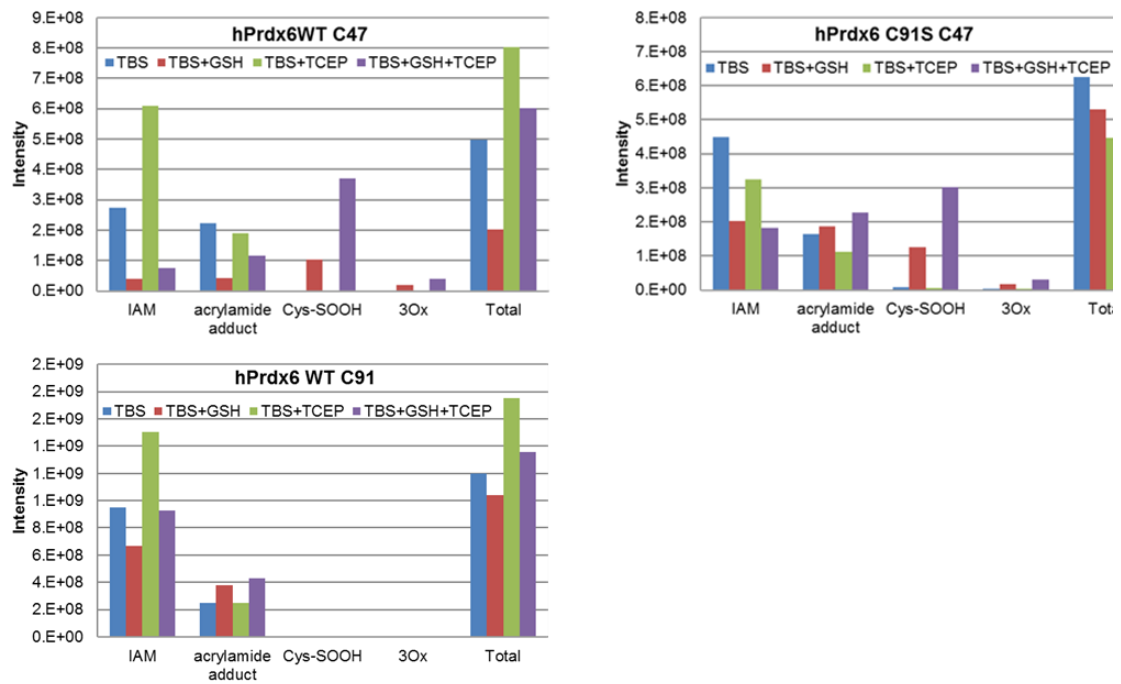

(C)

**Figure S2.** Relative quantitation based on the intensity of modified peptides from LC-MS/MS data analysis after treatment with GSH (+/- TCEP). **A.** LC-MS/MS fragmentation pattern of untreated hPrdx6WT (C\*-iodoacetamide derivative) **B.** LC-MS/MS fragmentation pattern of hPrdx6WT after treatment with GSH and TCEP (C#-Cys-SOOH) **C.** Intensity of the variable cysteine modifications on peptides C47 DFTPVCTTELGR and C91 DINAYNCEEPTEK in hPrdx6WT and hPrdx6C91S.
